# Supplementary material
Source: Springer Nature journal article supplement (https://www.springermedizin.de/resource/supplementary/12970_2007_40_MOESM6_ESM.pdf/9594286)

Left: ACTH (pg/mL/min), Right: Cortisol (ng/mL/min)

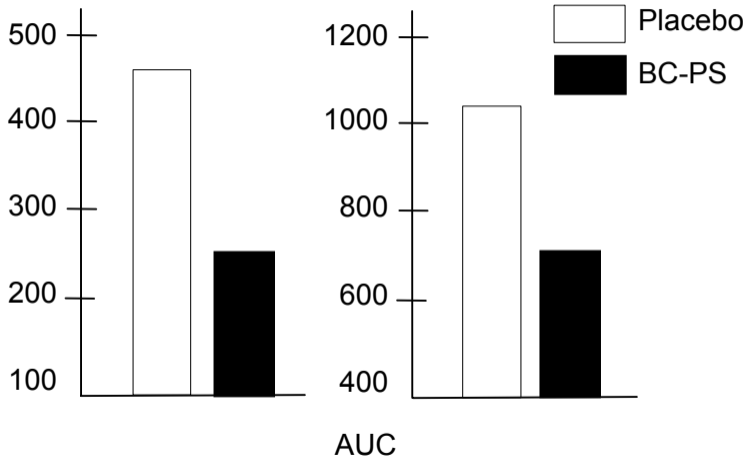

Supplement: MOESM6 [file 9594286]
